# Supplementary material for: Incidence of schizophrenia among migrants in the Netherlands: a direct comparison of first contact longitudinal register approaches
Source: PubMed Central journal article supplement (PMC5329083; doi:10.1007/s00127-016-1310-8), 2016-11-15
Supplement: 127_2016_1310_MOESM1_ESM.pdf [file 127_2016_1310_MOESM1_ESM.pdf]

Table S1: Sociodemographic and pathway characteristics

| Migrant group | By both |            |            |           | Extra by LPR |            |            |           | Total |            |            |           |
|---------------|---------|------------|------------|-----------|--------------|------------|------------|-----------|-------|------------|------------|-----------|
|               | N       | % male (n) | AFC (sd)   | DPT (sd)  | N            | % male (n) | AFC (sd)   | DPT (sd)  | N     | % male (n) | AFC (sd)   | DPT (sd)  |
| Native Dutch  | 81      | 74.1 (60)  | 26.3 (5.8) | 2.8 (3.4) | 278          | 65.1 (181) | 32.2 (8.7) | 7.2 (6)   | 359   | 67.1 (241) | 30.8 (8.5) | 6.2 (5.8) |
| Caribbean     | 35      | 74.3 (26)  | 27.3 (7.8) | 2.4 (2.2) | 151          | 68.9 (104) | 33.0 (9.0) | 4.6 (4.3) | 186   | 69.9 (130) | 31.9 (9.1) | 4.1 (4.1) |
| Turkish       | 24      | 70.8 (17)  | 25.8 (5.9) | 1.8 (1.5) | 35           | 74.3 (26)  | 29.0 (7.3) | 5.9 (4.6) | 59    | 72.9 (43)  | 27.7 (6.9) | 4.2 (4.1) |
| Moroccan      | 34      | 76.5 (26)  | 24.8 (4.7) | 1.9 (1.8) | 54           | 79.6 (43)  | 28.9 (8.4) | 5 (4)     | 88    | 78.4 (69)  | 27.3 (7.4) | 3.8 (3.7) |
| Other         | 39      | 74.4 (29)  | 26.2 (7.4) | 1.9 (2.5) | 147          | 62.6 (92)  | 33.0 (8.7) | 4.3 (4.4) | 186   | 65.1 (121) | 31.6 (8.9) | 3.8 (4.2) |
| Total         | 213     | 74.2 (158) | 26.2 (6.3) | 2.3 (2.7) | 665          | 67.1 (446) | 32.1 (8.8) | 5.7 (5.2) | 878   | 68.8 (604) | 30.7 (8.6) | 4.9 (5.0) |

By both: incident cases identified by both methods; Extra by LPR: additional cases identified by the longitudinal psychiatric register; AFC (sd): age at first contact with mental health services (standard deviation); DPT (sd): duration of prior treatment before the index diagnosis of schizophrenia (standard deviation)

Table S2: Sensitivity analysis

|                                                                             | Caribbean           | Turkish            | Morrocan            | Other               | Native Dutch        | All migrants        | Total               |
|-----------------------------------------------------------------------------|---------------------|--------------------|---------------------|---------------------|---------------------|---------------------|---------------------|
| Number of cases                                                             | 180                 | 57                 | 77                  | 183                 | 346                 | 497                 | 843                 |
| Indicators of diagnostic validity                                           |                     |                    |                     |                     |                     |                     |                     |
| Years in catchment area before index (95% CI)                               | 9.4 (2.6 to 22.4)   | 14.1 (4.7 to 22.5) | 7.4 (2.9 to 13.8)   | 4.8 (0.8 to 10.2)   | 11.1 (3.3 to 27.4)  | 7.4 (1.5 to 17.1)   | 8.5 (2.2 to 21.7)   |
| Share LTF or retracted during first year after index (n)                    | 10.6 (19)           | 3.5 (2)            | 7.8 (6)             | 24 (44)             | 15.9 (55)           | 14.3 (72)           | 14.9 (126)          |
| Mean no of audits (95% CI)                                                  | 4.5 (3 to 6)        | 5 (3 to 7)         | 4 (3 to 6)          | 4 (1 to 6)          | 5 (2 to 7)          | 4 (3 to 6)          | 4 (2 to 7)          |
| Mean no of teams who did audits (95% CI)                                    | 2 (1 to 3)          | 2 (1 to 4)         | 2 (1 to 3)          | 2 (1 to 3)          | 2 (1 to 4)          | 2 (1 to 3)          | 2 (1 to 3)          |
| Mean interval between audits, in years (95% CI)                             | 1.1 (0.7 to 1.5)    | 1.1 (0.8 to 1.4)   | 1.2 (0.9 to 1.7)    | 1.1 (0.6 to 1.5)    | 1 (0.7 to 1.4)      | 1.1 (0.7 to 1.5)    | 1.1 (0.7 to 1.5)    |
| 5-year stability (95% CI)                                                   | 89.5 (84.5 to 94.7) | 92.7 (85.0 to 1)   | 88.1 (80.6 to 96.2) | 92.8 (88.3 to 97.5) | 90.6 (87.1 to 94.2) | 90.7 (87.8 to 93.7) | 90.6 (88.4 to 92.9) |
| Levels of available evidence to support clinical diagnosis of schizophrenia |                     |                    |                     |                     |                     |                     |                     |
| Research diagnosis (%)                                                      | 34 (20.0)           | 23 (41.1)          | 26 (35.6)           | 42 (25.1)           | 70 (20.9)           | 125 (26.8)          | 195 (24.3)          |
| Very high (%)                                                               | 52 (30.6)           | 17 (30.4)          | 26 (35.6)           | 55 (32.9)           | 124 (37)            | 150 (32.2)          | 274 (34.2)          |
| High (%)                                                                    | 69 (40.6)           | 13 (23.2)          | 20 (27.4)           | 53 (31.7)           | 115 (34.3)          | 155 (33.3)          | 270 (33.7)          |
| Standard (%)                                                                | 15 (8.8)            | 3 (5.4)            | 1 (1.5)             | 17 (10.2)           | 26 (7.8)            | 36 (7.7)            | 62 (7.7)            |
| Suspect for in-migration (excluded)                                         | 10                  | 1                  | 4                   | 16                  | 11                  | 31                  | 42                  |
| Incidence rates at incremental levels of available evidence                 |                     |                    |                     |                     |                     |                     |                     |
| Including only research diagnosis (95% CI)                                  | 21 (15 to 30)       | 30 (19 to 45)      | 48 (31 to 70)       | 16 (11 to 21)       | 11 (8 to 13)        |                     |                     |
| Including also very high quality (95% CI)                                   | 54 (43 to 67)       | 52 (37 to 71)      | 96 (71 to 125)      | 36 (29 to 44)       | 29 (25 to 34)       |                     |                     |
| Including also high quality (95% CI)                                        | 97 (83 to 114)      | 69 (51 to 90)      | 132 (104 to 167)    | 55 (47 to 65)       | 47 (42 to 52)       |                     |                     |
| Including also standard quality (95% CI)                                    | 107 (91 to 124)     | 73 (55 to 94)      | 134 (105 to 169)    | 62 (53 to 72)       | 51 (45 to 57)       |                     |                     |
| Including all cases (95% CI) (even suspect cases)                           | 113 (97 to 131)     | 74 (56 to 96)      | 141 (112 to 177)    | 68 (58 to 78)       | 52 (47 to 58)       |                     |                     |
| Incidence ratios at incremental levels of available evidence                |                     |                    |                     |                     |                     |                     |                     |
| Including only research diagnosis (95% CI)                                  | 2.0 (1.3 to 3)      | 2.8 (1.7 to 4.5)   | 4.5 (2.8 to 7)      | 1.5 (1 to 2.1)      | ref                 |                     |                     |
| Including also very high quality (95% CI)                                   | 1.8 (1.4 to 2.4)    | 1.8 (1.2 to 2.5)   | 3.3 (2.4 to 4.4)    | 1.2 (1 to 1.6)      | ref                 |                     |                     |
| Including also high quality (95% CI)                                        | 2.1 (1.7 to 2.5)    | 1.5 (1.1 to 1.9)   | 2.8 (2.2 to 3.6)    | 1.2 (1 to 1.4)      | ref                 |                     |                     |
| Including also standard quality (95% CI)                                    | 2.1 (1.7 to 2.5)    | 1.4 (1.1 to 1.9)   | 2.6 (2 to 3.4)      | 1.2 (1 to 1.5)      | ref                 |                     |                     |
| Including all cases (even suspect cases) (95% CI)                           | 2.2 (1.8 to 2.6)    | 1.4 (1.1 to 1.9)   | 2.7 (2.1 to 3.4)    | 1.3 (1.1 to 1.5)    | ref                 |                     |                     |
